# Supplementary material for: Modified spectrophotometry for micromolar H2O2 determination in iron-containing solutions with leuco crystal violet under both aerobic and anaerobic conditions
Source: Royal Society of Chemistry journal article supplement (doi:10.1039/d4ay01469c), 2024-01-01

Supplementary Information (SI) for Analytical Methods.  
This journal is © The Royal Society of Chemistry 2024

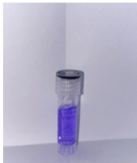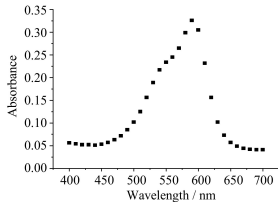

Supplement: d4ay01469c2.pdf [file d4ay01469c2.pdf]
