# Supplementary figures and images for: Modified spectrophotometry for micromolar H2O2 determination in iron-containing solutions with leuco crystal violet under both aerobic and anaerobic conditions
Source: Royal Society of Chemistry journal article supplement (doi:10.1039/d4ay01469c), 2024-01-01

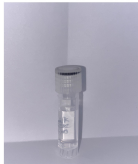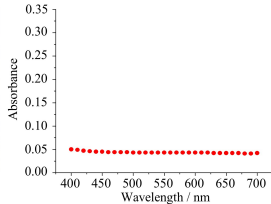

Supplement: d4ay01469c1.pdf [file d4ay01469c1.pdf]

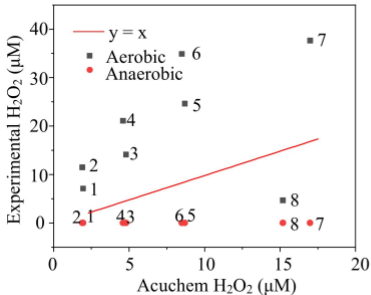

Supplement: d4ay01469c3.pdf [file d4ay01469c3.pdf]

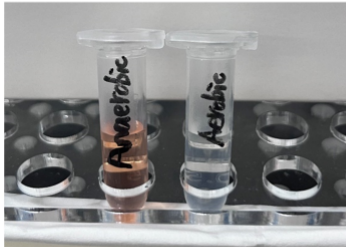

Supplement: d4ay01469c4.pdf [file d4ay01469c4.pdf]

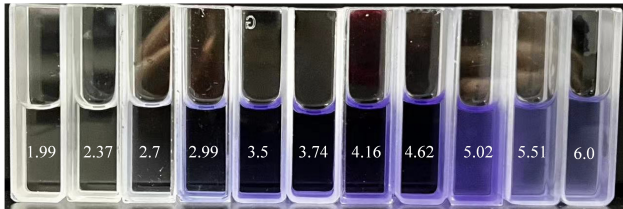

Supplement: d4ay01469c5.pdf [file d4ay01469c5.pdf]

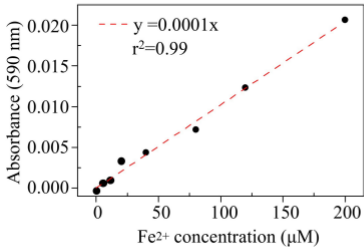

Supplement: d4ay01469c6.pdf [file d4ay01469c6.pdf]

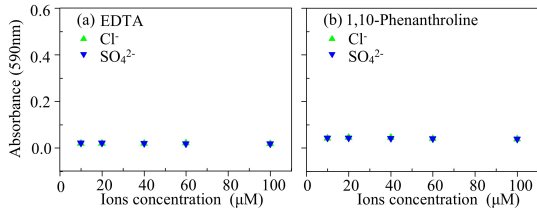

Supplement: d4ay01469c7.pdf [file d4ay01469c7.pdf]

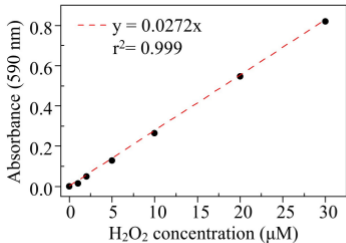

Supplement: d4ay01469c8.pdf [file d4ay01469c8.pdf]

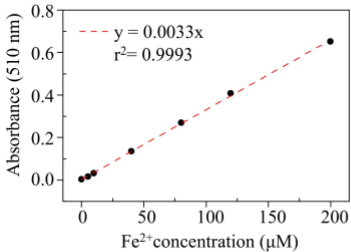

Supplement: d4ay01469c9.pdf [file d4ay01469c9.pdf]
